# Supplementary material for: Mutational signatures of non‐homologous and polymerase theta‐mediated end‐joining in embryonic stem cells
Source: PubMed Central journal article supplement (PMC5730883; doi:10.15252/embj.201796948), 2017-10-27
Supplement: EMBJ-36-3634-s001.pdf [file EMBJ-36-3634-s001.pdf]

## Appendix

Table of contents

|                                |        |
|--------------------------------|--------|
| Appendix supplementary legends | Page 2 |
| Appendix Figure S1             | Page 3 |
| Appendix Figure S2             | Page 4 |
| Appendix Table S1              | Page 5 |
| Appendix Table S2              | Page 6 |

## **Supplementary Figure 1. Formation of tandem duplications**

A) Model to explain that *de novo* DNA synthesis (indicated in blue) combined with ssDNA resection (strikethrough) results in the formation of a tandem duplication (underlined) upon the induction of a DSB with 5' ssDNA overhangs by Cas9-D10A (cut sites indicated by red triangles). B) Graphical illustration to explain how a complex arrangement can be the result of iterative rounds of nicking and DSB repair: re-cutting the tandem duplication that results from repair of the initial DSB can result a repair product that will be annotated as deletion (dashed line) with a templated insert (underlined sequence) by our bio-informatical classification software.

## **Supplementary Figure 2. Validation of Pol $\lambda$ and Pol $\mu$ knockout cell-lines and immunoblots Cas9-nickases *HPRT* assay**

A) Immunoblots to confirm loss of Polymerase Lambda (upper panel) and Polymerase Mu (middle panel) protein expression in the used knockout clones. Polymerase Lambda runs on a similar height as a nonspecific band. An immunoblot for Tubulin is included as a loading control (lower panel). B-C) Immunoblots to confirm equal Cas9 protein expression between samples (upper panels), which corresponds with Figure 6B and 6E respectively). Immunoblots for Tubulin are included as a loading control (lower panel).

## **Table S1. Overview of guide RNAs and oligonucleotides used**

## **Table S2. Absolute *HPRT* mutation frequencies**

# Appendix Figure S1

A

5' CCTAATCATTATGCCGAGGATTTGGAAAAAGTGTATTTCCTCATGGACTGATTATGG 3'  
 3' GGATTAGTAATACGGCTCCTAAACCTTTTCACAAATAAGGAGTACCTGACTAATACC 5' *HPRT exon 2*

cutting of Cas9-D10A

5' CATTATGCCGAGGATTTGGAAAAAGTGTATTTCCTCATGGACTGATTATGG 3'  
 AATACC 5'

5' CCTAAT  
 3' GGATTAGTAATACGGCTCCTAAACCTTTTCACAAATAAGGAGTACCTGACT 5'

de novo DNA synthesis and resection

5' CCTAATCATTATGCCGAGGATTTGGAAAAAGTGTATTTCCTCATGGACTGATTATGG 3'  
 3' GGATTAGTAATACGGCTCCTAAACCTTTTCACAAATAAGGAGTACCTGACTAATACC 5'

ligation of blunt DNA ends

Tandem duplication:  
 5' CCTAATCATTATGCCGAGGATTTGGAAAAAGTGTATTTCCTCATGGACTGATTATGG 3'  
 3' GGATTAGTAATACGGCTCCTAAACCTTTTCACAAATTCCTAAACCTTTTCACAAATAAGGAGTACCTGACTAATACC 5'

B

5' CCTAATCATTATGCCGAGGATTTGGAAAAAGTGTATTTCCTCATGGACTGATTATGG 3'  
 3' GGATTAGTAATACGGCTCCTAAACCTTTTCACAAATAAGGAGTACCTGACTAATACC 5' *HPRT exon 2*

cutting of Cas9-D10A

5' CATTATGCCGAGGATTTGGAAAAAGTGTATTTCCTCATGGACTGATTATGG 3'  
 AATACC 5'

5' CCTAAT  
 3' GGATTAGTAATACGGCTCCTAAACCTTTTCACAAATAAGGAGTACCTGACT 5'

de novo DNA synthesis and resection

5' CATTATGCCGAGGATTTGGAAAAAGTGTATTTCCTCATGGACTGATTATGG 3'  
 TTCACAAATAAGGAGTACCTGACTAATACC 5'  
 5' CCTAATCATTATGCCGAGGATTTGGAAAAAGTGTATTTCCTCATGGACTGATTATGG 3'  
 3' GGATTAGTAATACGGCTCCTAAACCTTTTCACAAATAAGGAGTACCTGACT 5'

ligation of blunt DNA ends

repair intermediate:

5' CCTAATCATTATGCCGAGGATTTGGAAAAAGTGTATTTCCTCATGGACTGATTATGG 3'  
 3' GGATTAGTAATACGGCTCCTAAACCTTTTCACAAATAAGGAGTACCTGACTTTCACAAATAAGGAGTACCTGACTAATACC 5'

re-cutting of Cas9-D10A on repair product

5' CATTATGCCGAGGATTTGGAAAAAGTGTATTTCCTCATGGACTGATTATGG 3'  
 AATACC 5'

5' CCTAAT  
 3' GGATTAGTAATACGGCTCCTAAACCTTTTCACAAATAAGGAGTACCTGACTTTCACAAATAAGGAGTACCTGACT 5'

de novo DNA synthesis and resection

5' CATTATGCCGAGGATTTGGAAAAAGTGTATTTCCTCATGGACTGATTATGG 3'  
 CTTTTTCACAAATAAGGAGTACCTGACTTTCACAAATAAGGAGTACCTGACTAATACC 5'

5' CCTAATC  
 3' GGATTAGTAATACGGCTCCTAAACCTTTTCACAAATAAGGAGTACCTGACTTTCACAAATAAGGAGTACCTGACT 5'

delin formation with templated insert

final repair product:

5' CCTAATC-----GAAAAAGTGTATTTCCTCATGGACTGATTATGG 3'  
 3' GGATTAG-----CTTTTTTCACAAATAAGGAGTACCTGACTTTCACAAATAAGGAGTACCTGACTAATACC 5'

Appendix Figure S2

A

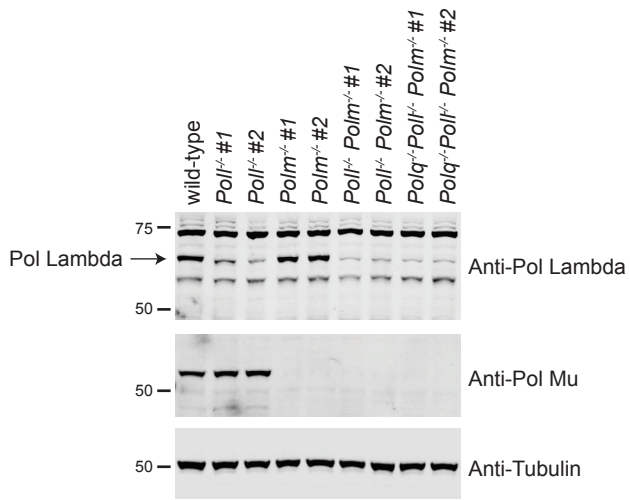

B

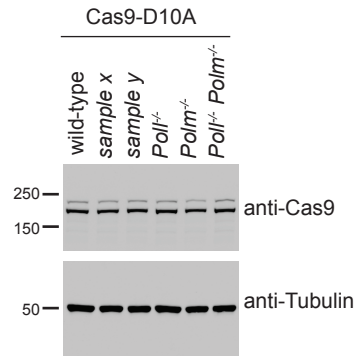

C

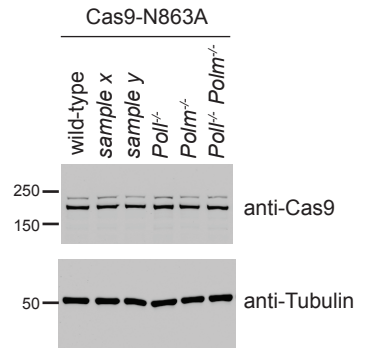

Appendix table S1

| Gene         | sgRNA                 | Exon | Forward oligonucleotide for genomic PCR (+ nested) | Reverse oligonucleotide for genomic PCR (+nested) | Oligo for sequencing  | Restriction site for RFLP | Remark                  |
|--------------|-----------------------|------|----------------------------------------------------|---------------------------------------------------|-----------------------|---------------------------|-------------------------|
| <i>Polq</i>  | GTCCGGCTCCGACACGTTCT  | 1    | GAGGCCGGAAGCCAGATATCAG                             | CAGCTGTGCATGCTGGCCAAG                             |                       | AflIII                    |                         |
| <i>Polq</i>  | GTGTAAGAAAGATGTTGAA   | 2    | GCTAGCATTCTGTATAGG                                 | CAAATGTCCTGTTCCCTCC                               |                       | TaqI                      |                         |
| <i>Ku80</i>  | GTGGATGTGGGGTTGCCAT   | 2    | CTTACCAGTCACATGATTG                                | CAAAGGATATAGGGCTCCAG                              |                       | NcoI                      |                         |
| <i>Ku80</i>  | CCTCAGCAGCCGTTTCAGCC  | 5    | CAGTTGTCTCTGTGGTGAGC                               | CCTCAGCTCAGAACAGTTC                               |                       | MwoI                      |                         |
| <i>LigIV</i> | GCACAACGTCACCACAGATC  | 1    | GCCAAGGTGCTTACAGAAAG                               | CAAACCTGGTCGGTATAGTTG                             |                       | BglII                     |                         |
| <i>LigIV</i> | TACAACCTATACCGACCAGTT | 1    | CAACGTCACCACAGATCTGG                               | CTAAGGATCTCATACTCTTC                              |                       | BsrI                      |                         |
| <i>PolI</i>  | AGGAGTCACTCACATTGTGG  | 2    | GAGGTCAAGGCAGGAGAATCAGAA (+GCTACATAGTCAGTTGAGG)    | GACTTGCTGGGCTGTGGTTCATC (+GAGGTCACAGAGATTAGGG)    |                       | DraIII                    |                         |
| <i>PolI</i>  | CTGAGCTTGTGCCTGCAGGA  | 2    | GAGGTCAAGGCAGGAGAATCAGAA (+GCTACATAGTCAGTTGAGG)    | GACTTGCTGGGCTGTGGTTCATC (+GAGGTCACAGAGATTAGGG)    |                       | PstI                      |                         |
| <i>Polm</i>  | GGAAGGGACCTCAGCCAAGG  | 2    | CGATGCTTTCCAAGTACATAC (+GTAACATGCCAAGTGGCTTG)      | ATCCTGAAATGGCAGCGGTC (+GTCTCTATTGCTTCCCAGG)       |                       | BglI                      |                         |
| <i>Polm</i>  | GGCTCTGGAGACGCTAGCGG  | 4    | CCTGGGAAAGCAATAGAGAC (+GCTGCCATTCAGGATGACC)        | CACTCCAGGATGCTTCTGAC (+GCTCTGAACCAAGTCTCCTG)      |                       | NheI                      |                         |
| <i>HPRT</i>  | TATACCTAATCATTATGCCG  | 2    | GAGTAGAAAAGTGTAGAGCCG (+GACTCTATTCAGCAGTAAGAC)     | CAGGCACTCACACATACAAG (+CAGCAAGAGACACTGATTC)       | GACTCTATTCAGCAGTAAGAC |                           | Cas9 WT                 |
| <i>HPRT</i>  | ACTTGCTCGAGATGTCATGA  | 3    | CAGCAGGATCTTGTATGTAG (+CTGGGCTATTTAGAGGGATTC)      | GGATAGTGTGAGCAAGTTAG (+CTTAGTCCCTGGGTCTAC)        | CTGGGCTATTTAGAGGGATTC |                           | Cas9 WT                 |
| <i>HPRT</i>  | AATCATTATGCCGAGGATTTG | 2    | GAGTAGAAAAGTGTAGAGCCG (+GACTCTATTCAGCAGTAAGAC)     | CAGGCACTCACACATACAAG (+CAGCAAGAGACACTGATTC)       | GACTCTATTCAGCAGTAAGAC |                           | Site A for Cas9 nickase |
| <i>HPRT</i>  | TATTCCTCATGGACTGATTA  | 2    | GAGTAGAAAAGTGTAGAGCCG (+GACTCTATTCAGCAGTAAGAC)     | CAGGCACTCACACATACAAG (+CAGCAAGAGACACTGATTC)       | GACTCTATTCAGCAGTAAGAC |                           | Site B for Cas9 nickase |

## Appendix table S2

### Cas9 Wild-type *HPRT* exon 2 (Fig 1E)

| Exp | Genotype: | wild-type | Polq-/- #1 | Polq-/- #2 | Ku80-/- #1 | Ku80-/- #2 | Lig4-/- #1 | Lig4-/- #2 | Polq-/- Ku80-/- #1 | Polq-/- Ku80-/- #2 |
|-----|-----------|-----------|------------|------------|------------|------------|------------|------------|--------------------|--------------------|
| 1   |           | 6.59E-02  | 3.05E-02   | 2.99E-02   | nd         | nd         | nd         | nd         | nd                 | nd                 |
| 2   |           | 1.49E-02  | 7.33E-03   | 4.50E-03   | 1.66E-02   | 2.77E-02   | 1.67E-02   | 2.80E-02   | nd                 | nd                 |
| 3   |           | 1.28E-01  | nd         | nd         | 1.10E-01   | 8.39E-02   | 1.05E-01   | 8.92E-02   | nd                 | nd                 |
| 4   |           | 2.15E-02  | 6.25E-03   | 6.69E-03   | 4.29E-02   | 3.65E-02   | 2.04E-02   | 2.92E-02   | 0.00E+00           | 0.00E+00           |
| 5   |           | 3.16E-01  | nd         | nd         | nd         | nd         | nd         | nd         | 5.84E-02           | 3.62E-02           |
| 6   |           | 1.07E-01  | nd         | nd         | nd         | nd         | nd         | nd         | 2.37E-03           | 2.53E-03           |

### Cas9 Wild-type *HPRT* exon 3 (Fig 1F)

| Exp | Genotype: | wild-type | Polq-/- #1 | Polq-/- #2 | Ku80-/- #1 | Ku80-/- #2 | Lig4-/- #1 | Lig4-/- #2 | Polq-/- Ku80-/- #1 | Polq-/- Ku80-/- #2 |
|-----|-----------|-----------|------------|------------|------------|------------|------------|------------|--------------------|--------------------|
| 1   |           | 6.52E-02  | 2.16E-02   | 1.85E-02   | nd         | nd         | nd         | nd         | nd                 | nd                 |
| 2   |           | 2.50E-02  | 1.11E-02   | 1.26E-02   | 2.59E-02   | 2.84E-02   | 3.58E-02   | 4.67E-02   | nd                 | nd                 |
| 3   |           | 1.32E-01  | nd         | nd         | 1.17E-01   | 9.42E-02   | 1.25E-01   | 1.01E-01   | nd                 | nd                 |
| 4   |           | 2.52E-02  | 4.81E-03   | 9.13E-03   | 4.37E-02   | 3.00E-02   | 2.20E-02   | 2.35E-02   | 6.25E-03           | 0.00E+00           |
| 5   |           | 4.23E-01  | nd         | nd         | nd         | nd         | nd         | nd         | 3.07E-02           | 8.67E-02           |
| 6   |           | 9.15E-02  | nd         | nd         | nd         | nd         | nd         | nd         | 2.33E-03           | 2.21E-03           |

### Cas9 D10A *HPRT* exon 2 (Fig 3A)

| Exp | Genotype: | wild-type | Polq-/- #1 | Polq-/- #2 | Ku80-/- #1 | Ku80-/- #2 | Lig4-/- #1 | Lig4-/- #2 | Polq-/- Ku80-/- #1 | Polq-/- Ku80-/- #2 |
|-----|-----------|-----------|------------|------------|------------|------------|------------|------------|--------------------|--------------------|
| 1   |           | 3.23E-01  | 2.63E-01   | 2.69E-01   | 2.78E-01   | 3.01E-01   | 2.33E-01   | 2.30E-01   | nd                 | nd                 |
| 2   |           | 2.59E-01  | 1.54E-01   | 1.81E-01   | 1.91E-01   | 1.77E-01   | 1.99E-01   | 2.02E-01   | nd                 | nd                 |
| 3   |           | 1.77E-01  | 1.55E-01   | 1.42E-01   | 1.57E-01   | 1.62E-01   | 2.05E-01   | 1.96E-01   | 5.75E-03           | 3.08E-03           |
| 4   |           | 4.42E-02  | nd         | nd         | nd         | nd         | nd         | nd         | 3.07E-04           | 1.75E-04           |

### Cas9 N863A *HPRT* exon 2 (Fig 3B)

| Exp | Genotype: | wild-type | Polq-/- #1 | Polq-/- #2 | Ku80-/- #1 | Ku80-/- #2 | Lig4-/- #1 | Lig4-/- #2 | Polq-/- Ku80-/- #1 | Polq-/- Ku80-/- #2 |
|-----|-----------|-----------|------------|------------|------------|------------|------------|------------|--------------------|--------------------|
| 1   |           | 1.19E-01  | 8.59E-02   | 8.74E-02   | 4.90E-02   | 4.39E-02   | 6.75E-02   | 6.16E-02   | nd                 | nd                 |
| 2   |           | 5.21E-02  | 2.45E-02   | 3.20E-02   | 1.10E-02   | 9.87E-03   | 2.30E-02   | 2.77E-02   | 7.37E-04           | 9.90E-05           |
| 3   |           | 1.26E-02  | nd         | nd         | nd         | nd         | nd         | nd         | 6.90E-04           | 0.00E+00           |
| 4   |           | 6.98E-03  | nd         | nd         | nd         | nd         | nd         | nd         | 0.00E+00           | 0.00E+00           |

### Cas9 D10A *HPRT* exon 2 (Fig 6B)

| Exp | Genotype: | wild-type | Poll-/- #1 | Poll-/- #2 | Polm-/- #1 | Polm-/- #2 | Poll-/- Polm-/- #1 | Poll-/- Polm-/- #2 |
|-----|-----------|-----------|------------|------------|------------|------------|--------------------|--------------------|
| 1   |           | 2.22E-01  | 3.56E-01   | nd         | 2.43E-01   | nd         | 1.53E-01           | nd                 |
| 2   |           | 2.60E-01  | nd         | 3.06E-01   | nd         | 2.19E-01   | nd                 | 2.18E-01           |
| 3   |           | 2.62E-01  | 2.43E-01   | nd         | 1.70E-01   | nd         | 2.04E-01           | nd                 |
| 4   |           | 2.73E-01  | nd         | 1.42E-01   | nd         | 1.82E-01   | nd                 | 1.64E-01           |

### Cas9 N863A *HPRT* exon 2 (Fig 6E)

| Exp | Genotype: | wild-type | Poll-/- #1 | Poll-/- #2 | Polm-/- #1 | Polm-/- #2 | Poll-/- Polm-/- #1 | Poll-/- Polm-/- #2 |
|-----|-----------|-----------|------------|------------|------------|------------|--------------------|--------------------|
| 1   |           | 4.36E-02  | 7.83E-02   | nd         | 6.01E-02   | nd         | 4.72E-02           | nd                 |
| 2   |           | 6.76E-02  | nd         | 7.61E-02   | nd         | 4.38E-02   | nd                 | 4.14E-02           |
| 3   |           | 6.84E-02  | 6.71E-02   | nd         | 4.49E-02   | nd         | 3.64E-02           | nd                 |
| 4   |           | 2.29E-02  | nd         | 2.67E-02   | nd         | 2.04E-02   | nd                 | 1.93E-02           |
